# Supplementary material
Source: publisher figshare collection journal article supplement (https://acs.figshare.com/ndownloader/files/23758316)
Supplement: Supplementary file 1 [file 23758316]

# Supporting Information

## The Role of Blend Ratio in Polymer:Fullerene Phototransistors

*Cintha Trujillo Herrera,<sup>1</sup> Min Ji Hong,<sup>1</sup> John G. Labram<sup>1\*</sup>*

<sup>1</sup>School of Electrical Engineering and Computer Science, Oregon State University, Corvallis,  
Oregon 97331, USA

### Corresponding Author

\*Email: [john.labram@oregonstate.edu](mailto:john.labram@oregonstate.edu)

### Table of Contents

|                                                            |    |
|------------------------------------------------------------|----|
| S1. Transfer Characteristics in the Dark .....             | 2  |
| S2. Transfer Characteristics under Illumination .....      | 3  |
| S3. Photocurrent .....                                     | 4  |
| S4. Responsivity .....                                     | 5  |
| S5. External Quantum Efficiency .....                      | 6  |
| S6. Change in Threshold Voltage under Illumination .....   | 7  |
| S7. Ratio of Photocurrent to Dark Current .....            | 8  |
| S8. Time-Resolved Microwave Conductivity (TRMC) Data ..... | 9  |
| Supporting References .....                                | 11 |

## S1. Transfer Characteristics in the Dark

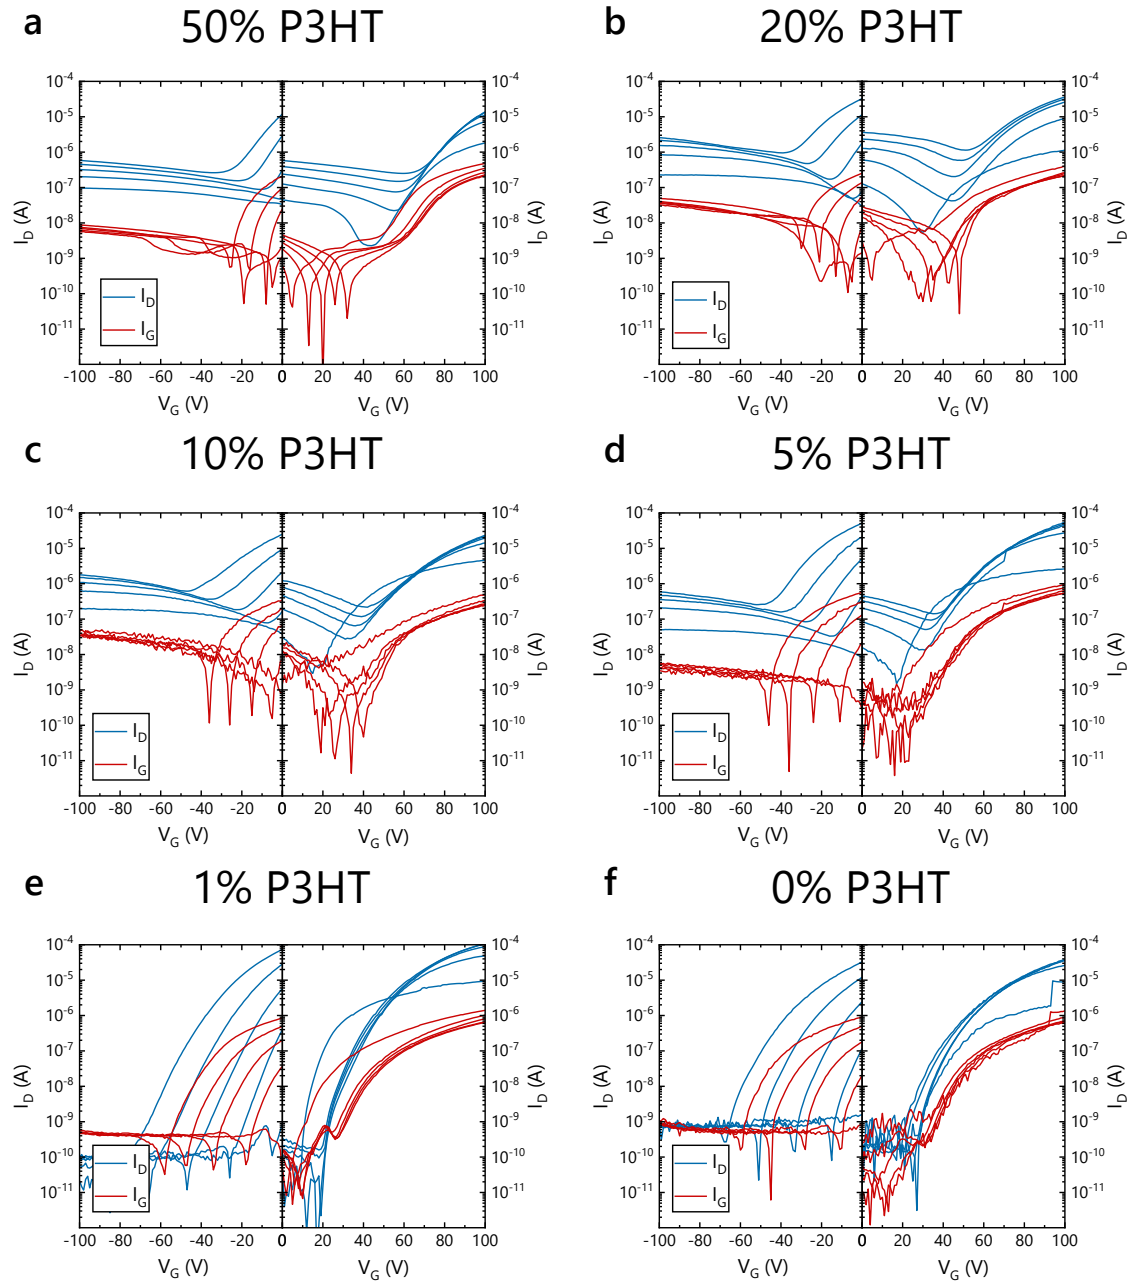

**Supplementary Figure S1** p-Type (left) and n-Type (right) transfer characteristics (source-drain current,  $I_D$ , as a function of gate voltage,  $V_G$ ) of poly(3-hexylthiophene-2,5-diyl) (P3HT) and phenyl-C<sub>61</sub>-butyric acid methyl ester (PCBM) blend thin-film transistors (TFT) measured in the dark. The weight % of P3HT was **a** 50%, **b** 20%, **c** 10%, **d** 5%, **e** 1%, **f** 0%. Source-drain current ( $I_D$ ) is shown in blue and gate leakage current ( $I_G$ ) is shown in red. Each device has a channel length of 20  $\mu\text{m}$ , a channel width of 1 cm, and a dielectric capacitance of 15 nF/cm<sup>2</sup>. Each line is a measurement carried out at a different drain voltage ( $V_D$ ) between  $V_D = -20\text{V}$  and  $-100\text{V}$  for p-type measurements and  $V_D = 20\text{V}$  and  $100\text{V}$  for n-type measurements. Devices were measured under atmospheric pressure N<sub>2</sub> at room temperature. All TFTs measured were in the bottom-gate, bottom-contact (BGBC) architecture, as shown in Figure 1a of the main text.

## S2. Transfer Characteristics under Illumination

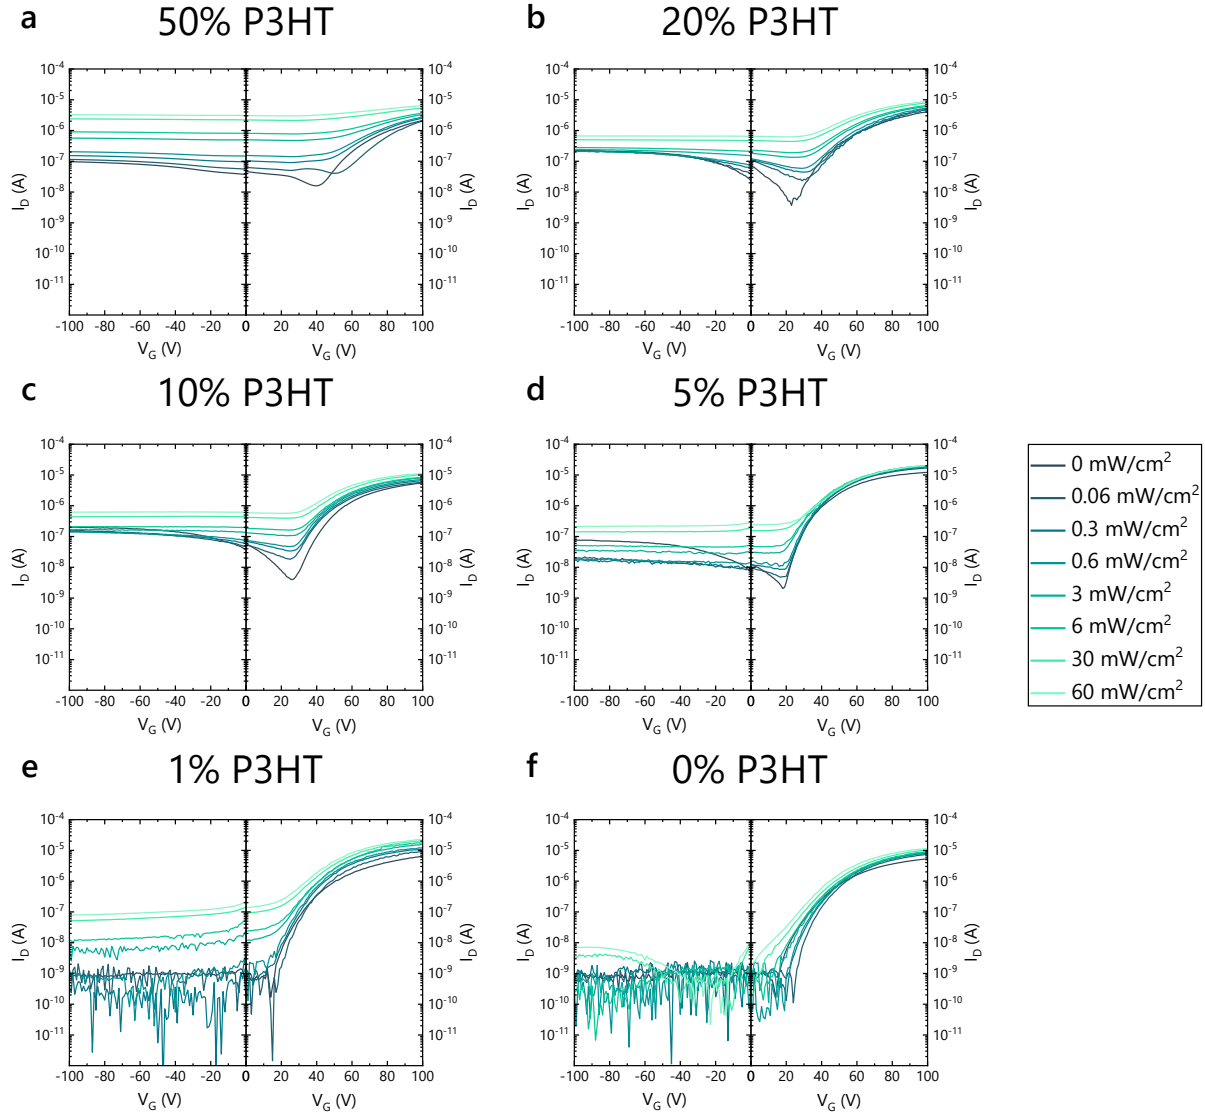

**Supplementary Figure S2** p-Type (left) and n-Type (right) transfer characteristics (source-drain current,  $I_D$ , as a function of gate voltage,  $V_G$ ) for thin film transistors (TFTs) formed of blends of poly(3-hexylthiophene-2,5-diyl) (P3HT) and phenyl-C<sub>61</sub>-butyric acid methyl ester (PCBM), measured under various intensities of green ( $\lambda_{\text{max}} = 525$  nm) light. The weight % of P3HT was **a** 50%, **b** 20%, **c** 10%, **d** 5%, **e** 1%, **f** 0%. All TFTs measured were in the bottom-gate, bottom-contact (BGBC) architecture, as shown in Figure 1a of the main text. All devices had a channel length of 20  $\mu\text{m}$ , a channel width of 1 cm, and a dielectric capacitance of 15  $\text{nF}/\text{cm}^2$ . Drain voltages of  $V_D = -20$  V were applied for negative  $V_G$  (left panels) and  $V_D = +20$  V, were applied for positive  $V_G$  (right panels). All devices were measured under atmospheric pressure  $\text{N}_2$  at room temperature. Legend shows incident optical power density.

### S3. Photocurrent

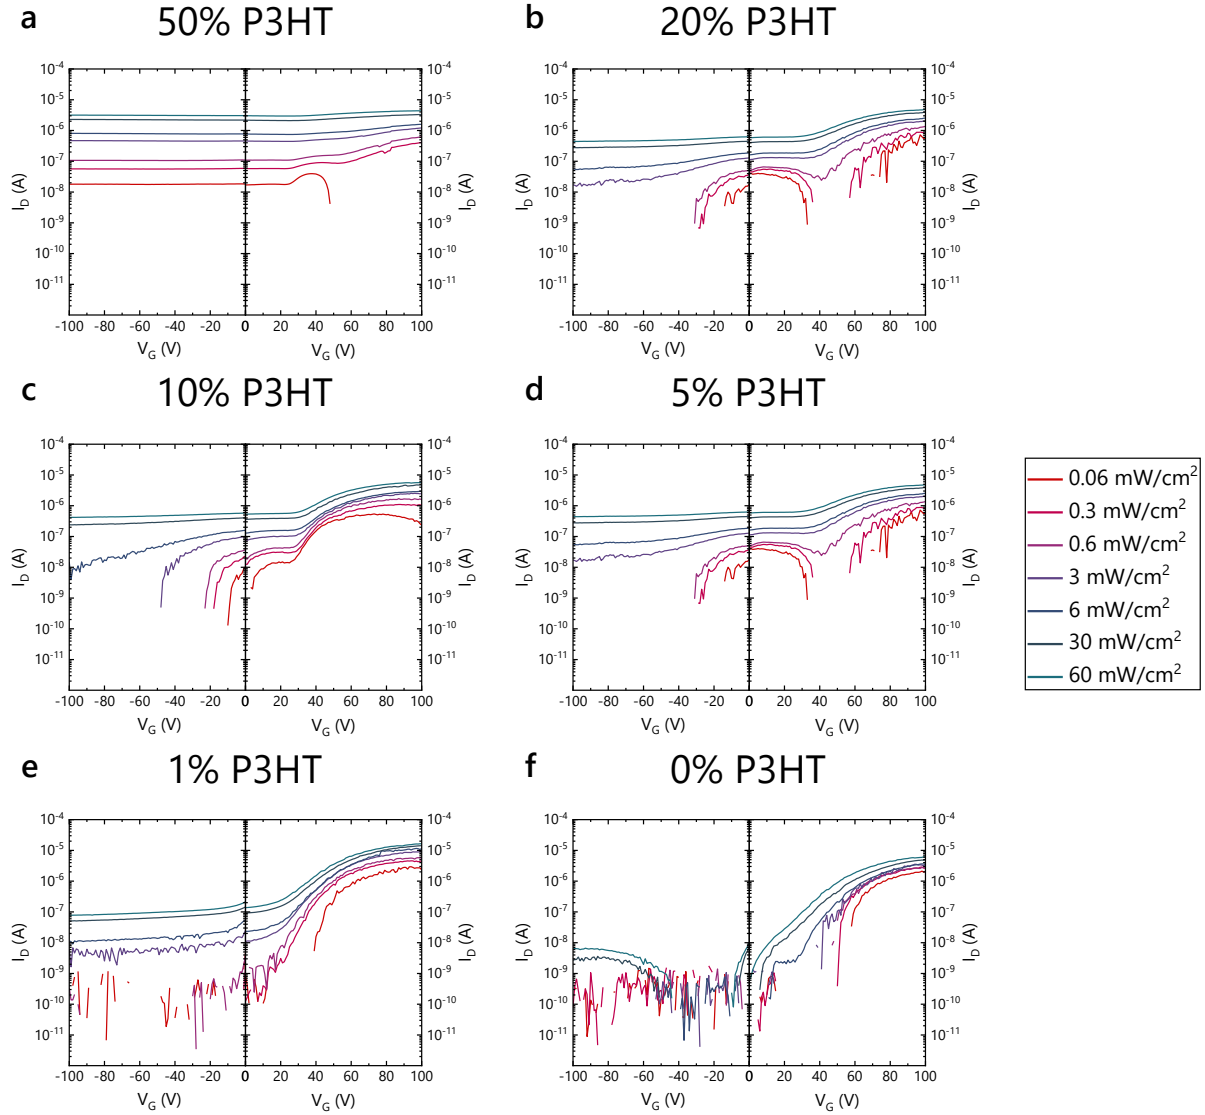

**Supplementary Figure S3** p-Type (left) and n-Type (right) photocurrent ( $I_{ph} = I_D^{(illuminated)} - I_D^{(dark)}$ ) for thin film transistors (TFTs) formed of blends of poly(3-hexylthiophene-2,5-diyl) (P3HT) and phenyl-C<sub>61</sub>-butyric acid methyl ester (PCBM), measured under various intensities of green ( $\lambda_{max} = 525$  nm) light. The weight % of P3HT was **a** 50%, **b** 20%, **c** 10%, **d** 5%, **e** 1%, **f** 0%. Negative values of  $I_{ph}$  are not displayed. All TFTs measured were in the bottom-gate, bottom-contact (BGBC) architecture, as shown in Figure 1a of the main text. All devices had a channel length of 20  $\mu$ m, a channel width of 1 cm, and a dielectric capacitance of 15 nF/cm<sup>2</sup>. Drain voltages of  $V_D = -20$  V were applied for negative  $V_G$  (left panels) and  $V_D = +20$  V, were applied for positive  $V_G$  (right panels). All devices were measured under atmospheric pressure N<sub>2</sub> at room temperature. Legend shows incident optical power density.

## S4. Responsivity

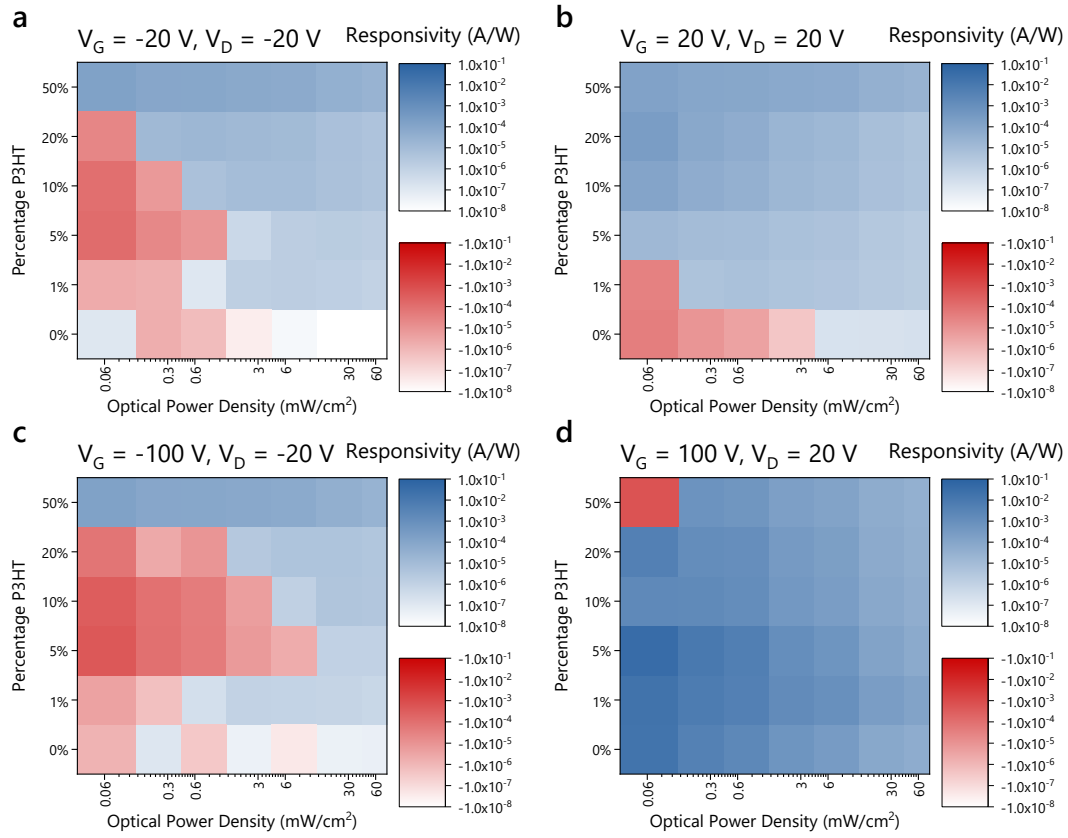

**Supplementary Figure S4** Responsivity of phototransistors formed of blends of poly(3-hexylthiophene-2,5-diyl) (P3HT) and phenyl- $C_{61}$ -butyric acid methyl ester (PCBM) with various weight % of P3HT, measured under various intensities of green ( $\lambda_{\text{max}} = 525 \text{ nm}$ ) light. Responsivities were extracted with applied drain ( $V_D$ ) and gate voltages ( $V_G$ ) of **a**  $V_D = -20 \text{ V}$  and  $V_G = -20 \text{ V}$ , **b**  $V_D = 20 \text{ V}$  and  $V_G = 20 \text{ V}$ , **c**  $V_D = -20 \text{ V}$  and  $V_G = -100 \text{ V}$ , **d**  $V_D = 20 \text{ V}$  and  $V_G = 100 \text{ V}$ , respectively. Blue represents positive responsivities and red represent negative responsivities. All phototransistors measured were in the bottom-gate, bottom-contact (BGBC) architecture, as shown in Figure 1a of the main text and had a channel length of  $20 \mu\text{m}$ , a channel width of  $1 \text{ cm}$ , and a dielectric capacitance of  $15 \text{ nF/cm}^2$ . All devices were measured under atmospheric pressure  $\text{N}_2$  at room temperature.

## S5. External Quantum Efficiency

External Quantum Efficiency (EQE) can be evaluated from responsivity via Equation S1:<sup>1</sup>

$$EQE = R \frac{hc}{e\lambda} = \frac{I_{ph}}{PLW} \frac{hc}{e\lambda} \quad (S1)$$

Here  $R$  is the responsivity,  $h$  is Planck's Constant,  $c$  is the speed of light *en vacuo*,  $e$  is the fundamental unit of charge,  $\lambda$  is the wavelength of incident photons (we here use the peak wavelength  $\lambda = 525$  nm),  $I_{ph}$  is the photo-induced change in drain current under illumination ( $I_{ph} = I_D^{(illuminated)} - I_D^{(dark)}$ ),  $P$  is the incident optical power density,  $L$  is the transistor channel length, and  $W$  is the transistor channel width. In Figure S5 the EQE is evaluated as a function of blend ratio and incident optical power density for applied voltages of **a**  $V_D = -20$  V,  $V_G = -20$  V and **b**  $V_D = 20$  V,  $V_G = 20$  V.

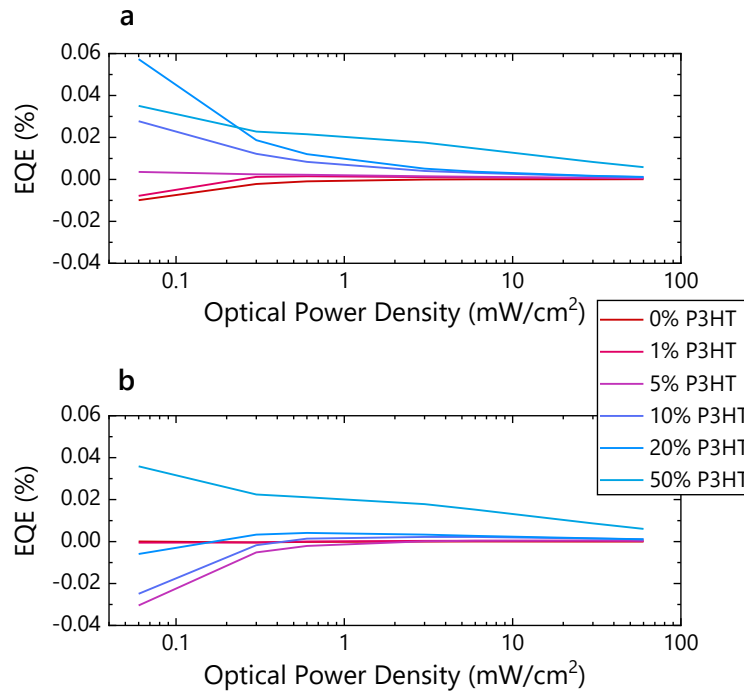

**Supplementary Figure S5** External Quantum Efficiency (EQE) of phototransistors formed of blends of poly(3-hexylthiophene-2,5-diyl) (P3HT) and phenyl-C<sub>61</sub>-butyric acid methyl ester (PCBM) with various weight % of P3HT, measured under various intensities of green ( $\lambda_{max} = 525$  nm) light, evaluated using Equation S1. EQEs were extracted with applied drain and gate voltages of **a**  $V_D = -20$  V and  $V_G = -20$  V, and **b**  $V_D = 20$  V and  $V_G = 20$  V, respectively. All phototransistors measured were in the bottom-gate, bottom-contact (BGBC) architecture, as shown in Figure 1a of the main text and had a channel length of 20  $\mu$ m, a channel width of 1 cm, and a dielectric capacitance of 15 nF/cm<sup>2</sup>. All devices were measured under atmospheric pressure N<sub>2</sub> at room temperature.

## S6. Change in Threshold Voltage under Illumination

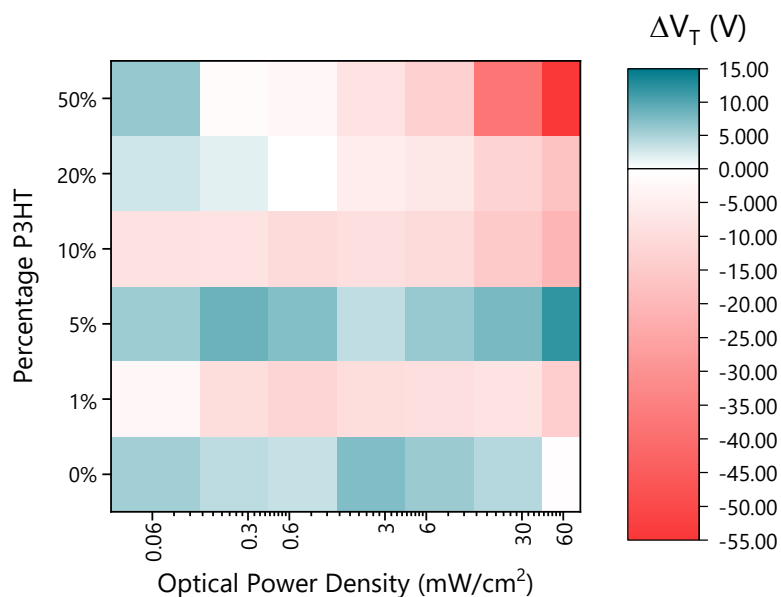

**Supplementary Figure S6** Change in n-channel threshold voltage ( $\Delta V_T$ ) of phototransistors formed of blends of poly(3-hexylthiophene-2,5-diyl) (P3HT) and phenyl-C<sub>61</sub>-butyric acid methyl ester (PCBM) with various weight % of P3HT, measured under various intensities of green ( $\lambda_{\text{max}} = 525$  nm) light.  $\Delta V_T$  was extracted with an applied drain voltage of  $V_D = 20$  V. Green represents positive changes in  $V_T$  and red represent negative changes in  $V_T$ . All phototransistors measured were in the bottom-gate, bottom-contact (BGBC) architecture, as shown in Figure 1a of the main text and had a channel length of 20  $\mu\text{m}$ , a channel width of 1 cm, and a dielectric capacitance of 15 nF/cm<sup>2</sup>. All devices were measured under atmospheric pressure N<sub>2</sub> at room temperature.

## S7. Ratio of Photocurrent to Dark Current

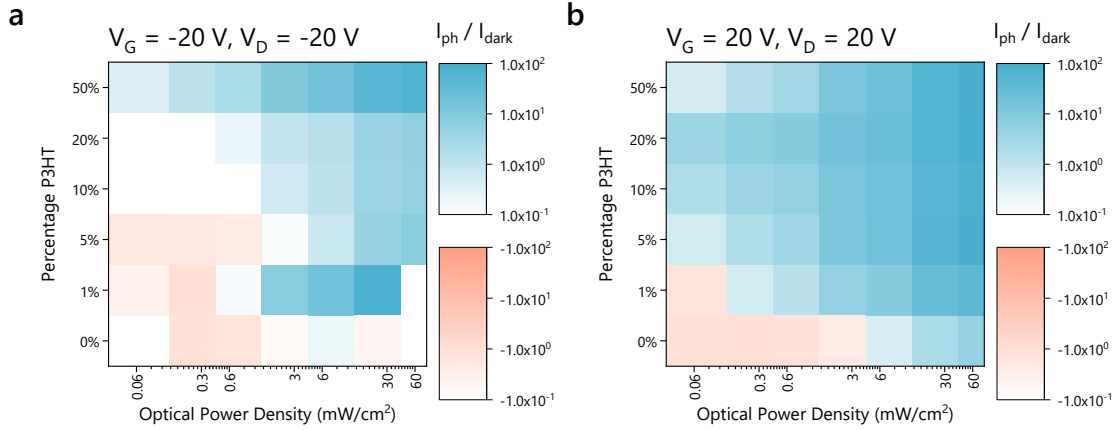

**Supplementary Figure S7** Ratio of photocurrent ( $I_{ph} = I_D^{(illuminated)} - I_D^{(dark)}$ ) to dark current ( $I_D^{(dark)}$ ) for phototransistors formed of blends of poly(3-hexylthiophene-2,5-diyl) (P3HT) and phenyl-C<sub>61</sub>-butyric acid methyl ester (PCBM) with various weight % of P3HT, measured under various intensities of green ( $\lambda_{max} = 525$  nm) light. Ratios were extracted with applied drain ( $V_D$ ) and gate voltages ( $V_G$ ) of **a**  $V_D = -20$  V and  $V_G = -20$  V, **b**  $V_D = 20$  V and  $V_G = 20$  V, respectively. All phototransistors measured were in the bottom-gate, bottom-contact (BGBC) architecture, as shown in Figure 1a of the main text and had a channel length of 20  $\mu$ m, a channel width of 1 cm, and a dielectric capacitance of 15 nF/cm<sup>2</sup>. All devices were measured under atmospheric pressure N<sub>2</sub> at room temperature.



## S8. Time-Resolved Microwave Conductivity (TRMC) Data

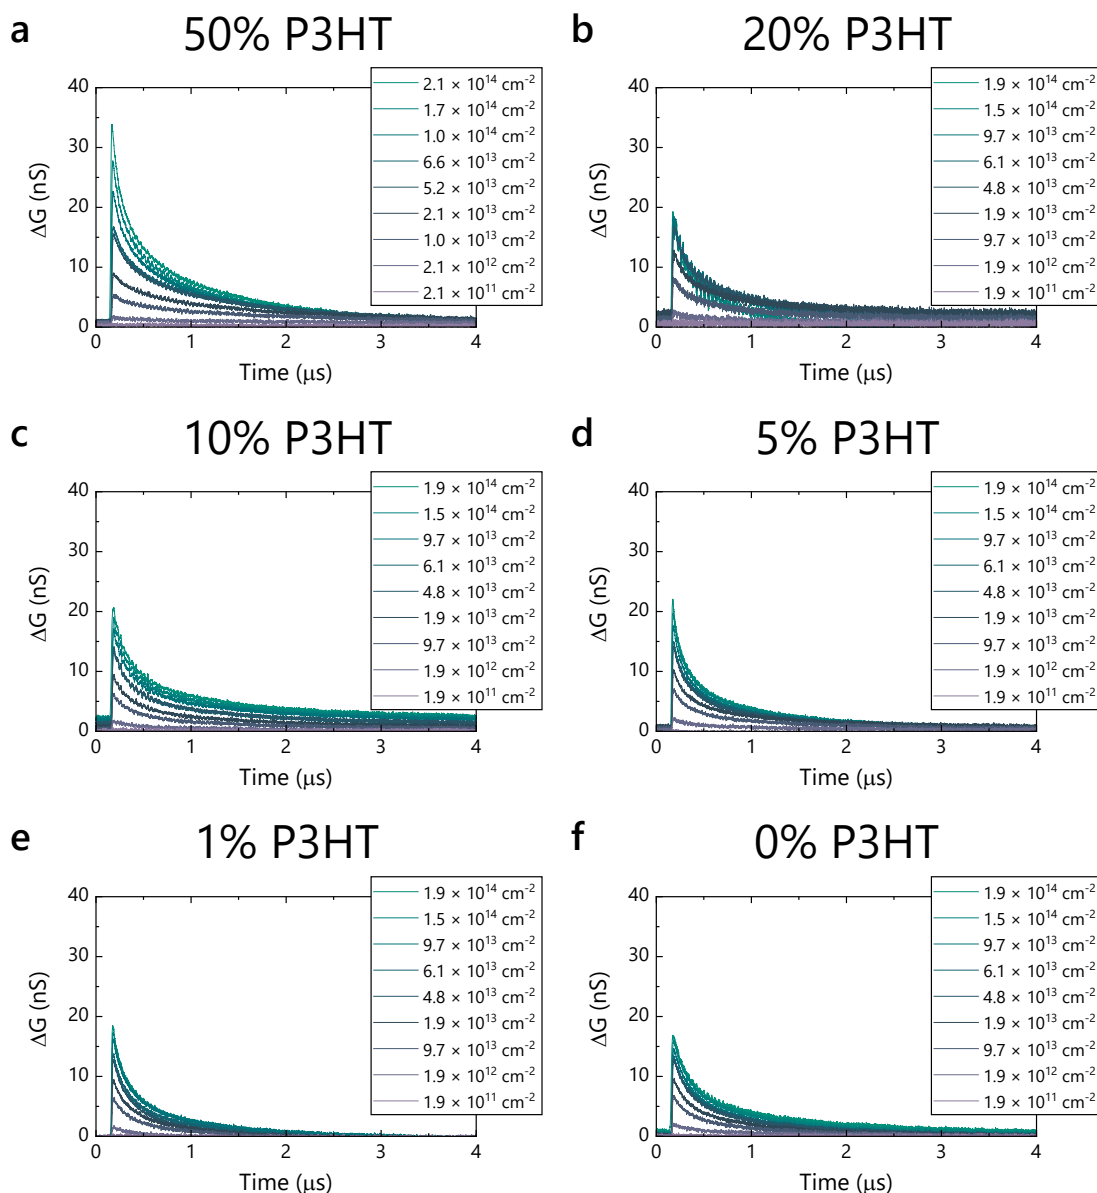

**Supplementary Figure S8** Photoconductance ( $\Delta G$ ) of blends of poly(3-hexylthiophene-2,5-diyl) (P3HT) and phenyl- $C_{61}$ -butyric acid methyl ester (PCBM) as a function of time before, during, and after excitation from a green (532 nm) laser pulse. The weight % of P3HT was **a** 50%, **b** 20%, **c** 10%, **d** 5%, **e** 1%, **f** 0%. The fluence of the laser is provided in the legends. All measurements were carried out using time-resolved microwave conductivity (TRMC) in air at room-temperature. The laser pulse had a full width half-maximum (FWHM) of roughly 5 ns in all cases.

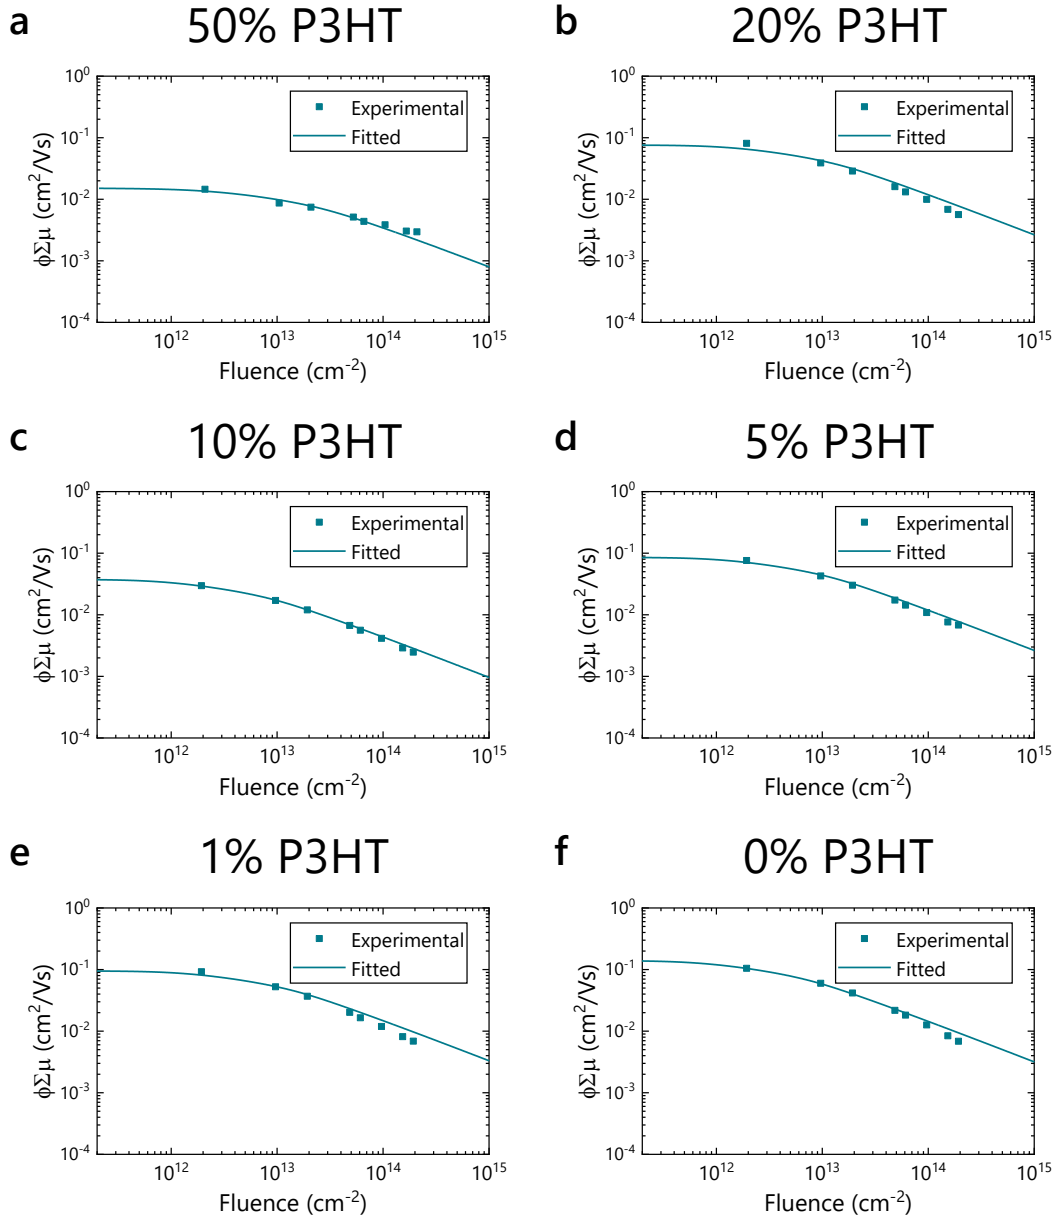

**Supplementary Figure S9** TRMC figure of merit and proxy for carrier mobility,  $\phi\Sigma\mu$ , as a function of incident laser fluence for blends of poly(3-hexylthiophene-2,5-diyl) (P3HT) and phenyl-C<sub>61</sub>-butyric acid methyl ester (PCBM). The weight % of P3HT was **a** 50%, **b** 20%, **c** 10%, **d** 5%, **e** 1%, **f** 0%.  $\phi\Sigma\mu = \phi(\mu_e + \mu_h)$  where  $\mu_e$  and  $\mu_h$  are the average electron and hole mobilities measured over the sample area, respectively.  $\phi$  is the carrier-generation efficiency, i.e. the number of electron-hole pairs generated per absorbed photon ( $\phi \in [0,1]$ ). The points are experimental values and the lines are fits to a numerical model accounting for bimolecular and Auger recombination during the laser pulse.<sup>2</sup> All measurements were carried out using time-resolved microwave conductivity (TRMC) in air at room-temperature. The laser pulse had a full width half-maximum (FWHM) of roughly 5 ns in all cases.

## Supporting References

- (1) Baeg, K.-J.; Binda, M.; Natali, D.; Caironi, M.; Noh, Y.-Y. Organic Light Detectors: Photodiodes and Phototransistors. *Adv. Mater.* **2013**, *25* (31), 4267–4295. <https://doi.org/10.1002/adma.201204979>.
- (2) Labram, J. G.; Chabinyk, M. L. Recombination at High Carrier Density in Methylammonium Lead Iodide Studied Using Time-Resolved Microwave Conductivity. *J. Appl. Phys.* **2017**, *122* (6), 065501. <https://doi.org/10.1063/1.4990802>.
